# Supplementary material
Source: publisher site journal article supplement (https://www.dovepress.com/article/468773)
Supplement: Supplementary file 1 [file get_supplementary_file.php]

Supplementary Table 1 HAMA, HAMD-24 Pairwise comparison between groups

| Paired comparison | Z-value | P-value | Adjusted P-value |
| --- | --- | --- | --- |
| **HAMA** |  |  |  |
| A-D | -1.573 | 0.116 | 1.000 |
| A-F | -1.820 | 0.069 | 1.000 |
| A-B | -11.360 | <0.001 | <0.001 |
| A-E | -11.378 | <0.001 | <0.001 |
| A-G | -11.394 | <0.001 | <0.001 |
| A-C | -11.403 | <0.001 | <0.001 |
| D-F | -0.247 | 0.805 | 1.000 |
| D-B | 9.787 | <0.001 | <0.001 |
| D-E | -9.806 | <0.001 | <0.001 |
| D-G | -9.821 | <0.001 | <0.001 |
| D-C | 9.830 | <0.001 | <0.001 |
| F-B | 9.540 | <0.001 | <0.001 |
| F-E | 9.559 | <0.001 | <0.001 |
| F-G | -9.574 | <0.001 | <0.001 |
| F-C | 9.583 | <0.001 | <0.001 |
| B-E | -0.019 | 0.985 | 1.000 |
| B-G | -0.034 | 0.973 | 1.000 |
| B-C | -0.043 | 0.966 | 1.000 |
| E-G | -0.016 | 0.988 | 1.000 |
| E-C | 0.025 | 0.980 | 1.000 |
| G-C | 0.009 | 0.993 | 1.000 |
| **HAMD-24** |  |  |  |
| A-C | -1.094 | 0.274 | 1.000 |
| A-E | -1.783 | 0.075 | 1.000 |
| A-D | -10.909 | <0.001 | <0.001 |
| A-B | -11.053 | <0.001 | <0.001 |
| A-F | -11.364 | <0.001 | <0.001 |
| A-G | -11.524 | <0.001 | <0.001 |
| C-E | -0.688 | 0.491 | 1.000 |
| C-D | -9.815 | <0.001 | <0.001 |
| C-B | 9.959 | <0.001 | <0.001 |
| C-F | -10.270 | <0.001 | <0.001 |
| C-G | -10.430 | <0.001 | <0.001 |
| E-D | 9.127 | <0.001 | <0.001 |
| E-B | 9.270 | <0.001 | <0.001 |
| E-F | -9.582 | <0.001 | <0.001 |
| E-G | -9.741 | <0.001 | <0.001 |
| D-B | 0.144 | 0.886 | 1.000 |
| D-F | -0.455 | 0.649 | 1.000 |
| D-G | -0.615 | 0.539 | 1.000 |
| B-F | -0.311 | 0.756 | 1.000 |
| B-G | -0.471 | 0.638 | 1.000 |
| F-G | -0.160 | 0.873 | 1.000 |

Supplementary Table2 Pro-inflammatory cytokines Pairwise comparison between groups

| Paired comparison | Z-value | P-value | Adjusted P-value |
| --- | --- | --- | --- |
| **IL-1β** |  |  |  |
| H-E | 5.265 | <0.001 | <0.001 |
| H-A | 5.560 | <0.001 | <0.001 |
| H-F | 5.723 | <0.001 | <0.001 |
| H-G | 9.479 | <0.001 | <0.001 |
| H-D | 13.763 | <0.001 | <0.001 |
| H-C | 14.150 | <0.001 | <0.001 |
| H-B | 17.311 | <0.001 | <0.001 |
| E-A | 0.295 | 0.768 | 1.000 |
| E-F | -0.458 | 0.647 | 1.000 |
| E-G | -4.215 | <0.001 | 0.001 |
| E-D | 8.498 | <0.001 | <0.001 |
| E-C | 8.885 | <0.001 | <0.001 |
| E-B | 12.047 | <0.001 | <0.001 |
| A-F | -0.163 | 0.871 | 1.000 |
| A-G | -3.920 | <0.001 | 0.002 |
| A-D | -8.203 | <0.001 | <0.001 |
| A-C | -8.590 | <0.001 | <0.001 |
| A-B | -11.752 | <0.001 | <0.001 |
| F-G | -3.757 | <0.001 | 0.005 |
| F-D | 8.040 | <0.001 | <0.001 |
| F-C | 8.427 | <0.001 | <0.001 |
| F-B | 11.589 | <0.001 | <0.001 |
| G-D | 4.284 | <0.001 | 0.001 |
| G-C | 4.671 | <0.001 | <0.001 |
| G-B | 7.832 | <0.001 | <0.001 |
| D-C | 0.387 | 0.699 | 1.000 |
| D-B | 3.548 | <0.001 | 0.011 |
| C-B | 3.161 | 0.002 | 0.044 |
| **TNF-α** |  |  |  |
| H-F | 0.360 | 0.719 | 1.000 |
| H-E | 0.371 | 0.711 | 1.000 |
| H-G | 1.229 | 0.219 | 1.000 |
| H-C | 5.551 | <0.001 | <0.001 |
| H-D | 5.814 | <0.001 | <0.001 |
| H-A | 5.898 | <0.001 | <0.001 |
| H-B | 6.372 | <0.001 | <0.001 |
| F-E | 0.011 | 0.991 | 1.000 |
| F-G | -0.869 | 0.385 | 1.000 |
| F-C | 5.192 | <0.001 | <0.001 |
| F-D | 5.454 | <0.001 | <0.001 |
| F-A | 5.538 | <0.001 | <0.001 |
| F-B | 6.012 | <0.001 | <0.001 |
| E-G | -0.859 | 0.390 | 1.000 |
| E-C | 5.181 | <0.001 | <0.001 |
| E-D | 5.443 | <0.001 | <0.001 |
| E-A | 5.527 | <0.001 | <0.001 |
| E-B | 6.001 | <0.001 | <0.001 |
| G-C | 4.322 | <0.001 | <0.001 |
| G-D | 4.584 | <0.001 | <0.001 |
| G-A | 4.668 | <0.001 | <0.001 |
| G-B | 5.143 | <0.001 | <0.001 |
| C-D | -0.262 | 0.793 | 1.000 |
| C-A | 0.346 | 0.729 | 1.000 |
| C-B | 0.821 | 0.412 | 1.000 |
| D-A | 0.084 | 0.933 | 1.000 |
| D-B | 0.558 | 0.577 | 1.000 |
| A-B | -0.474 | 0.635 | 1.000 |
| **IL-17** |  |  |  |
| H-E | 4.651 | <0.001 | <0.001 |
| H-F | 4.995 | <0.001 | <0.001 |
| H-A | 5.143 | <0.001 | <0.001 |
| H-G | 8.672 | <0.001 | <0.001 |
| H-D | 13.317 | <0.001 | <0.001 |
| H-C | 13.530 | <0.001 | <0.001 |
| H-B | 16.874 | <0.001 | <0.001 |
| E-F | -0.344 | 0.731 | 1.000 |
| E-A | 0.492 | 0.623 | 1.000 |
| E-G | -4.021 | <0.001 | 0.002 |
| E-D | 8.666 | <0.001 | <0.001 |
| E-C | 8.879 | <0.001 | <0.001 |
| E-B | 12.223 | <0.001 | <0.001 |
| F-A | 0.148 | 0.882 | 1.000 |
| F-G | -3.677 | <0.001 | 0.007 |
| F-D | 8.322 | <0.001 | <0.001 |
| F-C | 8.536 | <0.001 | <0.001 |
| F-B | 11.879 | <0.001 | <0.001 |
| A-G | -3.529 | <0.001 | 0.012 |
| A-D | -8.174 | <0.001 | <0.001 |
| A-C | -8.387 | <0.001 | <0.001 |
| A-B | -11.731 | <0.001 | <0.001 |
| G-D | 4.645 | <0.001 | <0.001 |
| G-C | 4.858 | <0.001 | <0.001 |
| G-B | 8.202 | <0.001 | <0.001 |
| D-C | 0.213 | 0.831 | 1.000 |
| D-B | 3.557 | <0.001 | 0.011 |
| C-B | 3.343 | <0.001 | 0.023 |
| **IL-8** |  |  |  |
| H-E | 4.269 | <0.001 | 0.001 |
| H-F | 4.331 | <0.001 | <0.001 |
| H-A | 5.012 | <0.001 | <0.001 |
| H-G | 8.551 | <0.001 | <0.001 |
| H-D | 12.735 | <0.001 | <0.001 |
| H-C | 12.955 | <0.001 | <0.001 |
| H-B | 17.001 | <0.001 | <0.001 |
| E-F | -0.062 | 0.951 | 1.000 |
| E-A | 0.743 | 0.457 | 1.000 |
| E-G | -4.282 | <0.001 | 0.001 |
| E-D | 8.466 | <0.001 | <0.001 |
| E-C | 8.686 | <0.001 | <0.001 |
| E-B | 12.731 | <0.001 | <0.001 |
| F-A | 0.682 | 0.495 | 1.000 |
| F-G | -4.220 | <0.001 | 0.001 |
| F-D | 8.404 | <0.001 | <0.001 |
| F-C | 8.624 | <0.001 | <0.001 |
| F-B | 12.670 | <0.001 | <0.001 |
| A-G | -3.538 | <0.001 | 0.011 |
| A-D | -7.723 | <0.001 | <0.001 |
| A-C | -7.943 | <0.001 | <0.001 |
| A-B | -11.988 | <0.001 | <0.001 |
| G-D | 4.184 | <0.001 | 0.001 |
| G-C | 4.404 | <0.001 | <0.001 |
| G-B | 8.450 | <0.001 | <0.001 |
| D-C | 0.220 | 0.826 | 1.000 |
| D-B | 4.265 | <0.001 | 0.001 |
| C-B | 4.046 | <0.001 | 0.001 |
